# Supplementary material for: Knowledge, practice and associated factors of essential newborn care at home among mothers in Gulomekada District, Eastern Tigray, Ethiopia, 2014
Source: PubMed Central journal article supplement (PMC4915039; doi:10.1186/s12884-016-0931-y), 2016-06-21
Supplement: 12884_2016_931_MOESM1_ESM.pdf [file 12884_2016_931_MOESM1_ESM.pdf]

## English Version Questionnaires

### Part-I. Socio-demographic characteristics of mothers with a child less than 6 month age.

| N <sup>o</sup> | Question                                                                    | Response                                                                                                             | Skip                              |
|----------------|-----------------------------------------------------------------------------|----------------------------------------------------------------------------------------------------------------------|-----------------------------------|
| 100            | Age of the mother                                                           | _____                                                                                                                |                                   |
| 101            | Age of the child                                                            | _____                                                                                                                |                                   |
| 102            | Sex of the child                                                            | 1. Male 2. Female                                                                                                    |                                   |
| 103            | Religion                                                                    | 1. Orthodox<br>2. Muslim<br>3. Protestant<br>4. Catholic<br>5. Other _____                                           |                                   |
| 104            | Ethnicity                                                                   | 1. Tigray 2. Other _____                                                                                             |                                   |
| 105            | Educational back ground                                                     | 1. Not able to read and write<br>2. Primary school<br>3. Secondary school<br>4. Diploma and above                    |                                   |
| 106            | Marital status                                                              | 1. Single<br>2. Married<br>3. Widow<br>4. Divorced                                                                   |                                   |
| 107            | Occupation                                                                  | 1. House wife<br>2. Merchant<br>3. Government employee<br>4. Non government employed<br>5. Student<br>6. Other _____ |                                   |
| 108            | Monthly income(ETB)                                                         | 1. <500<br>2. 500-1000<br>3. >1000<br>4. Do not know                                                                 |                                   |
| 109            | Number of children born alive                                               | _____                                                                                                                |                                   |
| 110            | Have you visited/counseled for ANC in your last pregnancy and delivery?     | 1. Yes 2. No                                                                                                         |                                   |
| 111            | Place of residency                                                          | 1. Urban 2. Rural                                                                                                    |                                   |
| 112            | Have source of information that you follow about maternal and child health? | 1. Yes<br>2. No                                                                                                      | If “no” leave question number 113 |
| 113            | What are the sources of information you have?                               | 1. Radio, Television<br>2. Health professional<br>3. Community leaders                                               |                                   |

**Part II. Knowledge questions regarding essential newborn care for mothers with an infant less than 6 month old.**

| N <sup>o</sup> | Questions                                                          | Response                                                                                                                                                                                                                                                                                                                                                                  | Skip |
|----------------|--------------------------------------------------------------------|---------------------------------------------------------------------------------------------------------------------------------------------------------------------------------------------------------------------------------------------------------------------------------------------------------------------------------------------------------------------------|------|
| 200            | What should be applied on the umbilical stump after it is cut?     | <ol style="list-style-type: none"> <li>1. Leave as it is</li> <li>2. Apply butter or oil</li> <li>3. Apply anti biotic cream</li> <li>4. Apply ash or soil</li> </ol>                                                                                                                                                                                                     |      |
| 201            | How can you maintain the normal body temperature of the baby?      | <ol style="list-style-type: none"> <li>1. using warm cloths</li> <li>2. kangaroo method</li> <li>3. warm cloth and keeping the baby close to the mothers body</li> <li>4. Do not know</li> </ol>                                                                                                                                                                          |      |
| 202            | When you should start the first breast feeding?                    | <ol style="list-style-type: none"> <li>1. Immediately after birth</li> <li>2. Within one hour after delivery</li> <li>3. After the placenta is removed</li> </ol>                                                                                                                                                                                                         |      |
| 203            | When you should to have first bathing for the baby after delivery? | <ol style="list-style-type: none"> <li>1. Immediately after delivery</li> <li>2. Before 24 hour of delivery</li> <li>3. After 24 hour of delivery</li> <li>4. I do not know about the exact time for bathing</li> </ol>                                                                                                                                                   |      |
| 204            | What danger signs of a new born did you know?                      | <ol style="list-style-type: none"> <li>1. Poor suckling or unable to breast feed</li> <li>2. Fast breathing</li> <li>3. Severe chest in drawing</li> <li>4. Hypothermia</li> <li>5. Fever</li> <li>6. Difficulty in movements or lethargic/unconsciousness</li> <li>7. severe umbilical infection, redness of skin around the cord and foul smelling discharge</li> </ol> |      |
| 205            | What material should be used for tying the cord after it is cut?   | <ol style="list-style-type: none"> <li>1. New string/thread</li> <li>2. Old string</li> <li>3. Fiber from local plant</li> <li>4. Cord should not tied</li> <li>5. I do not know</li> </ol>                                                                                                                                                                               |      |

**Part-III. Practice questions regarding essential newborn care for mothers with an infant less than 6 month old.**

| <b>Nº</b> | <b>Questions</b>                                                                                                 | <b>Response</b>                                                                                                                                                                                                                                                            | <b>Skip</b>                                 |
|-----------|------------------------------------------------------------------------------------------------------------------|----------------------------------------------------------------------------------------------------------------------------------------------------------------------------------------------------------------------------------------------------------------------------|---------------------------------------------|
| 300       | Who assisted or attended to you during delivery?                                                                 | <ol style="list-style-type: none"> <li>1. no attendant</li> <li>2. neighbor</li> <li>3. mother</li> <li>4. other family member</li> <li>5. Nurse or midwife</li> <li>6. Health extension worker</li> <li>7. Traditional birth attendant</li> <li>8. others ____</li> </ol> |                                             |
| 301       | What instrument was used to cut the cord?                                                                        | <ol style="list-style-type: none"> <li>1. New blade</li> <li>2. Old blade</li> <li>3. Household knife</li> <li>4. Unknown</li> <li>5. Others __</li> </ol>                                                                                                                 |                                             |
| 302       | Did the instrument boiled before used?                                                                           | <ol style="list-style-type: none"> <li>1. Yes</li> <li>2. No</li> <li>3. Do not know</li> </ol>                                                                                                                                                                            |                                             |
| 303       | What was used to tie the cord?                                                                                   | <ol style="list-style-type: none"> <li>1. New tie</li> <li>2. Boiled string or thread</li> <li>3. Un boiled string</li> <li>4. Do not know</li> <li>5. Other____</li> </ol>                                                                                                |                                             |
| 304       | On what surface was the cord cut?                                                                                | <ol style="list-style-type: none"> <li>1. Plastic disc</li> <li>2. Metal coin</li> <li>3. Wood</li> <li>4. Nothing</li> <li>5. Other____</li> <li>6. Do not know</li> </ol>                                                                                                |                                             |
| 305       | Did the person who handled the baby assisting with delivery washed hands with soap and water first?              | <ol style="list-style-type: none"> <li>1. Yes</li> <li>2. No</li> <li>3. Do not know</li> </ol>                                                                                                                                                                            |                                             |
| 306       | Did anybody apply anything on the stump after the cord was cut?                                                  | <ol style="list-style-type: none"> <li>1. Yes</li> <li>2. No</li> <li>3. Do not know</li> </ol>                                                                                                                                                                            | If “no” or “I do not know” skip question 24 |
| 307       | What did you applied?                                                                                            | <ol style="list-style-type: none"> <li>1. Oil or butter</li> <li>2. Ash</li> <li>3. Anti biotic cream</li> <li>4. Ointment/powder</li> <li>5. Other____</li> <li>6. Do not know</li> </ol>                                                                                 |                                             |
| 308       | Was your baby wrapped in cloth or put on mother’s body and covered with cloth before the placenta was delivered? | <ol style="list-style-type: none"> <li>1. Yes</li> <li>2. No</li> <li>3. Do not know</li> </ol>                                                                                                                                                                            | If “no” or “I do not know” skip question 26 |

|     |                                                                                |                                                                                                                                                                                                                                                                                                                                        |                                                |
|-----|--------------------------------------------------------------------------------|----------------------------------------------------------------------------------------------------------------------------------------------------------------------------------------------------------------------------------------------------------------------------------------------------------------------------------------|------------------------------------------------|
| 309 | What was the condition of the cloth for wrapping?                              | <ol style="list-style-type: none"> <li>1. Clean cloth</li> <li>2. Dry cloth</li> <li>3. New cloth</li> <li>4. Used cloth</li> <li>5. Wet cloth</li> <li>6. Other_____</li> <li>7. Do not know</li> </ol>                                                                                                                               |                                                |
| 310 | When did you bath the baby after birth?                                        | <ol style="list-style-type: none"> <li>1. Immediately after birth</li> <li>2. Before 24 hours</li> <li>3. After 24 hours</li> <li>4. Do not know</li> </ol>                                                                                                                                                                            |                                                |
| 311 | Where was the baby placed before placenta was delivered?                       | <ol style="list-style-type: none"> <li>1. Floor</li> <li>2. Besides the mother's body</li> <li>3. With someone else</li> <li>4. Other____</li> <li>5. Do not know</li> </ol>                                                                                                                                                           |                                                |
| 312 | Did you give the baby colostrums the first liquid that comes from your breast? | <ol style="list-style-type: none"> <li>1. Yes</li> <li>2. No</li> <li>3. Do not know</li> </ol>                                                                                                                                                                                                                                        | If "yes" skip question 30                      |
| 313 | Why you did not give colostrums?                                               | <ol style="list-style-type: none"> <li>1. It is harmful for the baby</li> <li>2. Prohibited by elderly</li> <li>3. Due to ignorance to its advantage</li> <li>4. Do not know</li> </ol>                                                                                                                                                |                                                |
| 314 | What was the baby fed on first?                                                | <ol style="list-style-type: none"> <li>1. Breast milk/colostrums</li> <li>2. Breast milk from other woman</li> <li>3. Formula feed-cow's milk</li> <li>4. Sugr water</li> <li>5. Plain water</li> <li>6. Honey</li> <li>8. Others _____</li> </ol>                                                                                     |                                                |
| 315 | How soon after birth was the baby breastfed?                                   | <ol style="list-style-type: none"> <li>1. within the first hour after delivery</li> <li>2. After one hour</li> <li>3. Do not know</li> </ol>                                                                                                                                                                                           |                                                |
| 316 | Did you start immunization?                                                    | <ol style="list-style-type: none"> <li>1. Yes</li> <li>2. No</li> </ol>                                                                                                                                                                                                                                                                | If yes skip question 34                        |
| 317 | If no why you did not immunized the baby?                                      | <ol style="list-style-type: none"> <li>1. Family members did not allow me.</li> <li>2. Baby was sick</li> <li>3. Baby was weak</li> <li>4. Distance to health facility is far</li> <li>5. Health professionals were not cooperative</li> <li>6. Lack of necessary logistics in the health facility.</li> <li>7. Do not know</li> </ol> |                                                |
| 318 | Where did you deliver you last child?                                          | <ol style="list-style-type: none"> <li>1. Home by the help of HEW</li> <li>2. Home without help</li> <li>3. Health post</li> <li>4. Health center</li> <li>5. Hospital</li> </ol>                                                                                                                                                      | If you deliver at home proceed to question 319 |
| 319 | Why did you deliver at home?                                                   | <ol style="list-style-type: none"> <li>1. Preference for home delivery</li> <li>2. Home delivery is easy and convenient</li> <li>3. All my previous deliveries were at home</li> </ol>                                                                                                                                                 |                                                |

4. Onset of labor before the expected date
5. Lack of transport during labor and Hospital is too far
6. Family members prefer home delivery
7. Fear of hospital-precipitate labor
8. Others -----
